# Supplementary material
Source: PubMed Central journal article supplement (PMC4313298)

Supplemental Figure 1: Distribution plot of members of the clusters generated with single nucleotide polymorphism-polymerase chain reaction genotyping, SNP-PCR (a), pulsed-field gel electrophoresis, PFGE (b), and phage typing, PT (c) of isolates of *Salmonella enterica* serovar Enteritidis (n = 55).

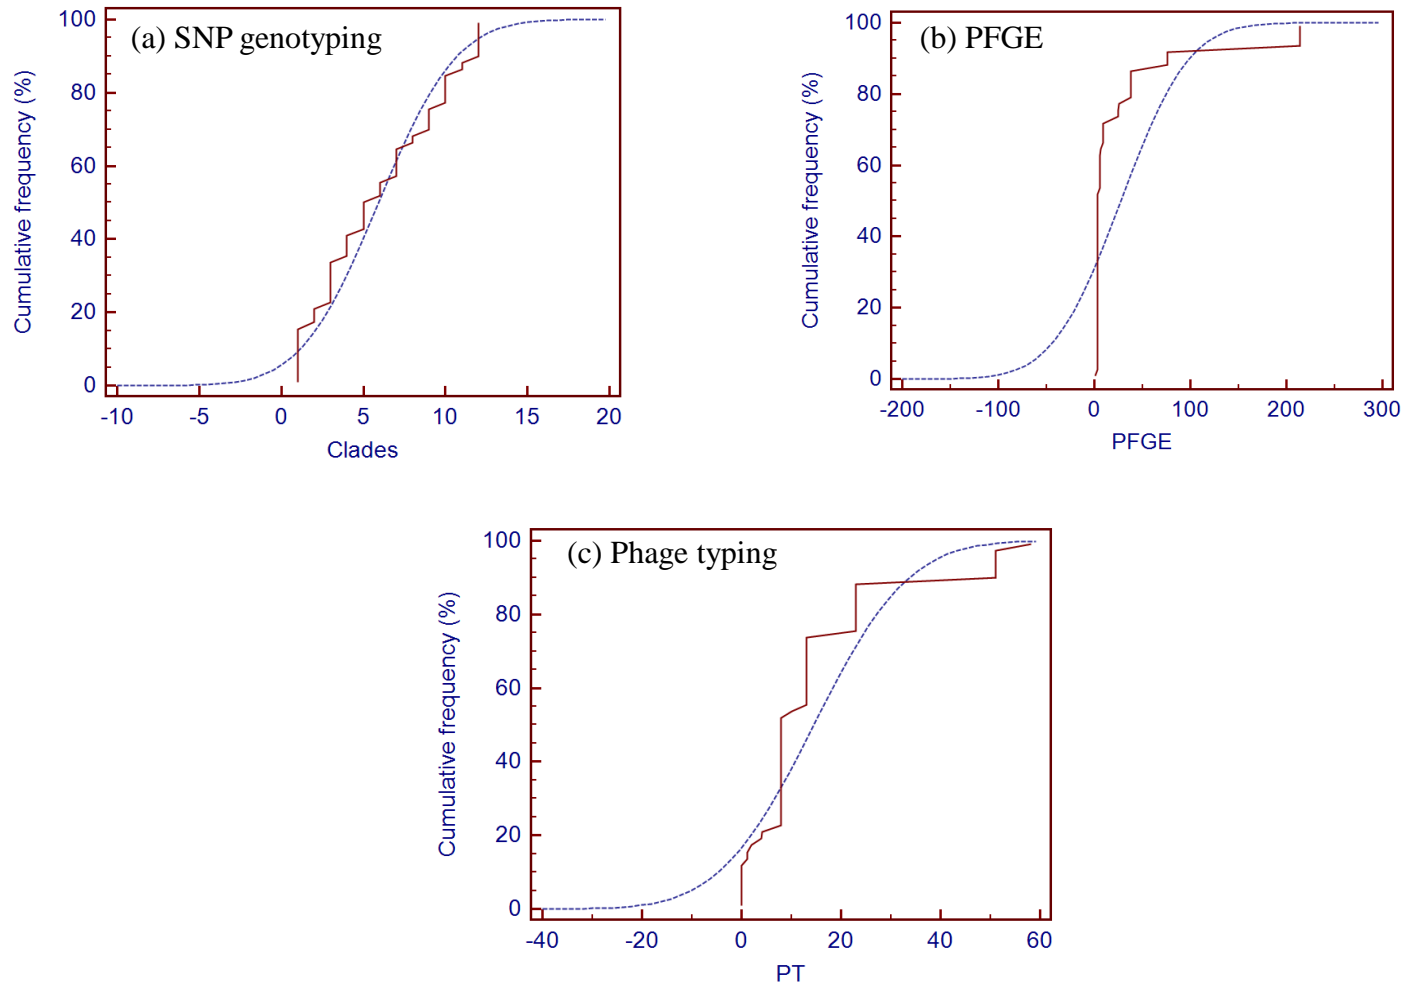

Supplement: JCM.01410-14_zjm999093903so1.pdf [file JCM.01410-14_zjm999093903so1.pdf]
